# Supplementary material for: A simple chemical route for composition graded Cu(In,Ga)S2 thin film solar cells: multi-stage paste coating
Source: Royal Society of Chemistry journal article supplement (doi:10.1039/c5ra20751g), 2015-01-01
Supplement: c5ra20751g1.pdf [file c5ra20751g1.pdf]

## Electronic Supplementary Information

### A simple chemical route for composition graded

### Cu(In,Ga)S<sub>2</sub> thin film solar cells: multi-stage paste coating

Se Jin Park,<sup>‡ab</sup> Hee Sang An,<sup>‡ac</sup> Ji Eun Kim,<sup>d</sup> Hyo Sang Jeon,<sup>a</sup> Sam S. Yoon,<sup>c</sup> Yun Jeong Hwang,<sup>a</sup>

Jihyun Kim,<sup>b</sup> Dong-Wook Kim<sup>\*d</sup> and Byoung Koun Min<sup>\*ac</sup>

<sup>a</sup>*Clean Energy Research Center, Korea Institute of Science and Technology, Hwarang-ro 14-gil 5, Seongbuk-gu, Seoul, 02792, Korea, E-mail: bkmin@kist.re.kr*

<sup>b</sup>*Department of Chemical and Biological Engineering, Korea University, 145, Anam-ro, Seongbuk-gu, Seoul, 02841, Korea*

<sup>c</sup>*Green School, Korea University, 145, Anam-ro, Seongbuk-gu, Seoul, 02841, Korea*

<sup>d</sup>*Department of Physics, Ewha Womans University, 52, Ewhayeodae-gil, Seodaemun-gu, Seoul, 03760, Korea, E-mail: dwkim@ewha.ac.kr*

<sup>‡</sup> *These authors contributed equally to this work.*

<sup>\*</sup> *Corresponding author. dwkim@ewha.ac.kr (D.-W. Kim) and bkmin@kist.re.kr (B. K. Min)*

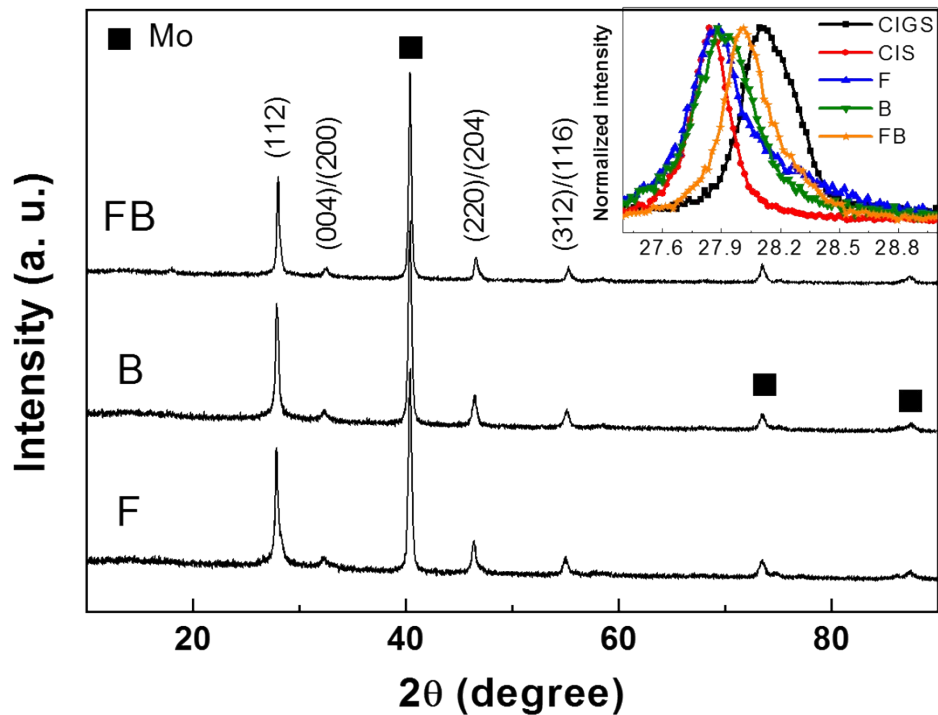

**Fig. S1** XRD patterns of the trilayered thin films with three different stacking configurations. The inset of Fig. S1 shows the peaks of (112) phase at the slightly different  $2\theta$  even though that of the CIS film is in good agreement with a Joint Committee on Powder Diffraction Standards reference (JCPDS #27-0159). By adding the Ga-included layer, the peaks shifted toward higher angle, which is attributed to the decrease of unit cell lattice parameter along with Ga incorporation. Note that the film F and B prepared by the same amount of Ga-included layer showed the peak at the same position implying that there is correlation between Ga contents and  $2\theta$  values.

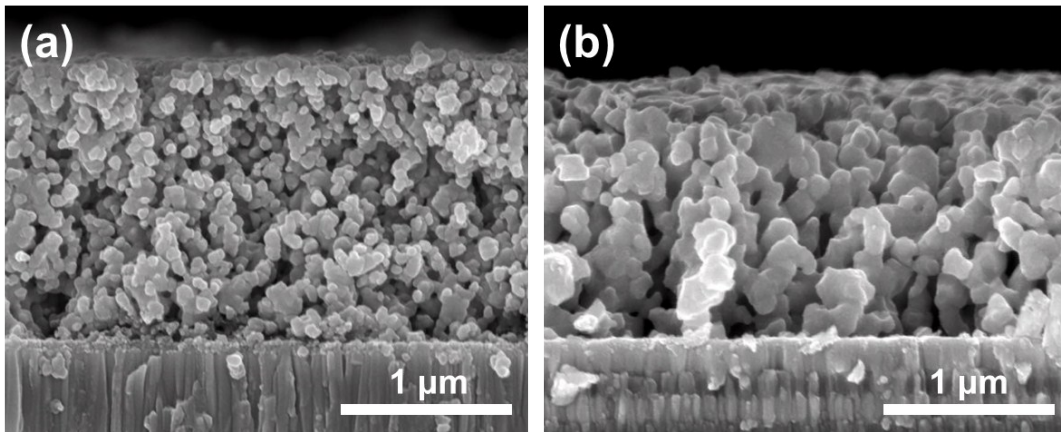

**Fig. S2** Crosse-sectional SEM image of the CIGS film prepared by only paste A (a) and the CIS film prepared by only paste B (b)

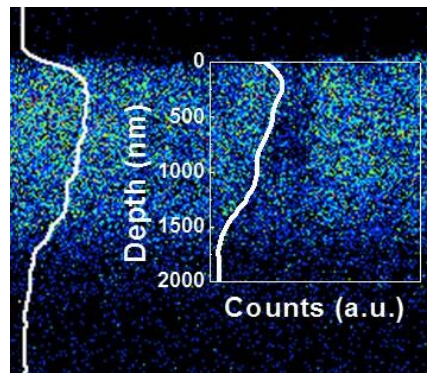

**Fig. S3** Ga composition profile (EPMA and AES (inset)) of a CIGS film synthesized by paste A only showing self-Ga grading profile

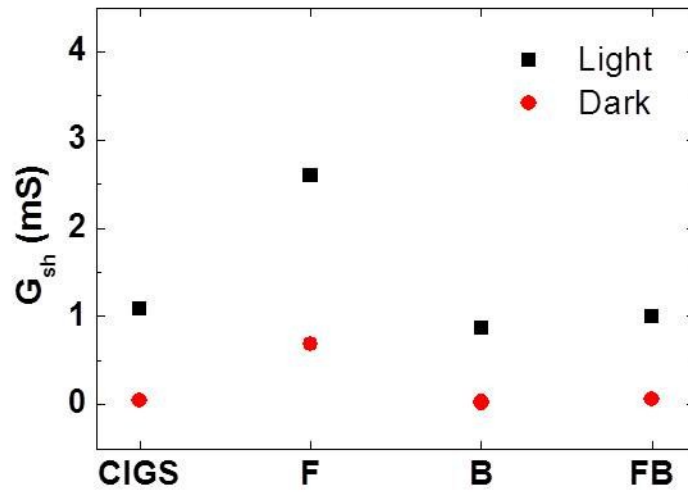

**Fig. S4** Shunt conductance of the trilayered cells (non-graded and front, back, and double gradient) measured under dark and light conditions

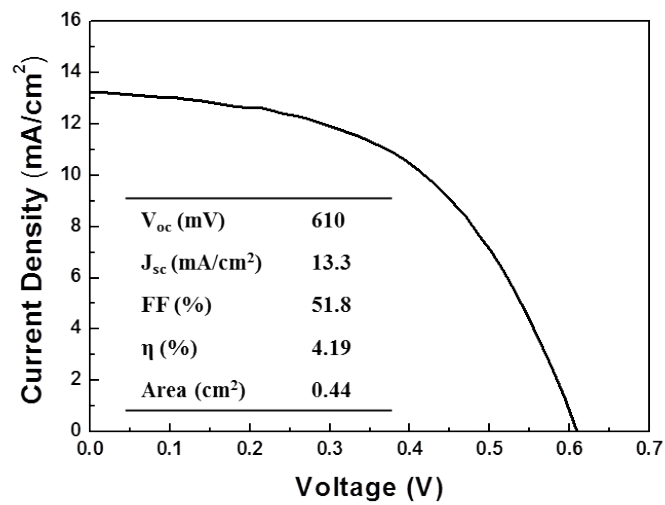

**Fig. S5**  $J$ - $V$  characteristics of the CIGS thin film solar cell device with the trilayered non-graded absorber film prepared by only paste A
